# Supplementary material
Source: PubMed Central journal article supplement (PMC5124491)
Supplement: NIHMS691471-supplement.pdf [file NIHMS691471-supplement.pdf]

**SUPPLEMENTARY DATA:**

**SAUR Proteins as Effectors of Hormonal and Environmental Signals  
in Plant Growth**

Hong Ren and William M. Gray<sup>1</sup>

Department of Plant Biology, University of Minnesota, 250 Biological Sciences Center,  
1445 Gortner Avenue, St. Paul, MN 55108, USA

<sup>1</sup>To whom correspondence should be addressed. E-mail: [grayx051@umn.edu](mailto:grayx051@umn.edu), fax 612-625-1738, tel. 612-624-3042



```

SAUR43_At5g42410 82 DVFIKLVNLRKTTNHHNNSVCFHNNSTKL-----L-----
SAUR58_At1g43040 77 QVFLNLHLYLKSTSHAPHYY--IDASHYL-----Y-----
SAUR44_At5g03310 99 TLFLEVLRCASPRYSL-----Y-----
SAUR46_At2g37030 103 STFLDVRRCAGAPQHNNCICI-----Y-----
SAUR57_At3g53250 88 NTFLDVRRCAGAPQHNNCIGM-----Y-----
SAUR42_At2g28085 113 SHLRMLLTFQWC-----Y-----
SAUR48_At3g09870 101 EVQKILQGSRES-----Y-----
SAUR61_At1g29420 93 VFLEYLIRLVQRMDGDTEKALI-----TSISST-RCSLPCSFQ---LQEHSSSTRL-----VF-----
SAUR68_At1g29490 93 IRFSWSISSN-----Y-----
SAUR64_At1g29450 92 VFLEYLIRLVQRMDADTEKALL-----MSISSA-RCSSQCCLK---LQERSTQQL-----LV---F-----
SAUR66_At1g29500 90 VFLEYLIRLVQRMDGDTEKALL-----MSISSA-RCS---LQ---KQEQSTQQL-----LV---F-----
SAUR65_At1g29460 100 VFLEYLIRLVQRMDGDTEKALL-----MSISSA-RCSMQPQEQ---QS-GYTQQL-----LV---F-----
SAUR62_At1g29430 94 AFLEYLIRLVQRMDGDTEKALL-----LSISSA-RSSFQPPQH---CSATQQL-----LV---F-----
SAUR75_At5g27780 95 VFLEYLIRLVQRMDGDTEKALL-----WSISSA-RCSLQPPQH---CSATQQL-----LV---F-----
SAUR63_At1g29440 93 AFLEYLIRLVQRMDGDTEKALL-----LSISSA-RCSFQPPQEQ---QC-STTQQL-----LV---F-----
SAUR67_At1g29510 94 VFLEYLIRLVQRMDGDTEKALL-----MSISSA-KCSLQCSLL---QEQSTQQL-----LV---L-----
SAUR30_At5g53590 105 DEFFKHVQEVLDDETHRRSHSGGGHNNH-----NHHNNLRCF-----
SAUR31_At4g00880 84 EEFYRQVQLDRENTFLGTNLLDH--HH-----HHNNHLIRCFRV-----
SAUR32_At2g46690 81 EEFYRQVQLDRENTFLGTNLLDH--HH-----HHNNHLIRCFRV-----
SAUR33_At3g61900 87 EEFYRQVQLDRENTFLGTNLLDH--HH-----HHNNHLIRCFRV-----
SAUR56_At1g76190 74 SIMDHIIMLVRSMSHSDYDDVE-----EDPVE-----KSSST-SSTCKGASISS--LFRG-----QSQLQSLV---S-----
SAUR60_At1g20470 76 GLMDHILMLLRNKSLSHDHDDG-----GDDGV-KKTMNQDVSPM-STSCKGASISS--YFFFLPRCNAAHQDKSLQSLV---F-----
SAUR55_At5g50760 109 DFFFKALADKSNPFGHDDHDD-----YDDDDG---F-----TNSPICGFVCSPYRSYGGGVTDPLAMKRNKSYKLLRSPSLFKLTRF
SAUR17_At4g09530 86 STFRSLVMFLISHQDKSH-----Y-----
SAUR41_At1g16510 108 IVFRRVVTETLRGGFEGSGDLE---NL---VASLLSGDEL--IPETTE-----
SAUR40_At1g79130 102 FVFQVVELELRSGIADDTSE-----L---IA-SLSGDEV--STE-----
SAUR71_At1g56150 92 LVFRRLESRLGLADRVT-----Y-----
SAUR72_At3g12830 104 LVFRRLESRLGLADRVT-----Y-----
SAUR49_At4g34750 91 SLFFEDLIAIVTRCESSSSSSRG---GNPPAATLEDLRCSHV-GL-----AKNNVESRPLL---PGIAEKSVK-
SAUR69_At5g10990 95 SVFEEISIRFIFTR-----SSRF---TCT---DDLKKNRHG-GIRS---K--LDLLMESRPLL---HGVSEKAIIW-
SAUR52_At1g75590 96 SVFEEISIRFISRSSTSRSRF---TCP---DDQKNCRRVVGIRS---K--LDLMIESRPLL---HGVTEKAVM-
SAUR53_At1g19840 95 SVFEEAIRFISRSSTSRSRF---TCP---DDLKCNCGGKIKS---K--LDLMIESRPLL---HGVTEKAVM-
SAUR37_At4g31320 134 AVFEEILKIMEEDNKSDAY---LTTQECRFNATSEEVMSYRHPSDCPRTPSHQPH-SPMCR-
SAUR38_At2g24400 118 SVFEEILKIMEEDNKSDAY---LTTQECRFNATSEEVMSYRHPSDCPRTPSHQPH-SPMCR-
SAUR47_At3g20220 102 SVFEEILIRYMSCDKRRK-----Y-----
SAUR36_At2g45210 136 SDFEYKTRIRASGSSSRVFP-----WGRHC--RN-----
SAUR59_At3g60690 145 SDFEYKTRIRASGSSSRVFP-----WGRHC--RN-----
SAUR18_At3g51200 94 NTFLTLLDSITSY-----Y-----
SAUR11_At5g66260 88 HFFRALISSINP-----Y-----
SAUR9_At4g36110 94 VVFRSLISMFR-----Y-----
SAUR10_At2g18010 102 VVFRSLISMFR-----Y-----
SAUR12_At2g21220 94 VVFRSLISMFR-----Y-----
SAUR16_At4g38860 95 VVFRSLISMFR-----Y-----
SAUR8_At2g16580 98 LFFQDLTSMIR-----Y-----
SAUR50_At4g34760 97 LVFQDLTSMIR-----Y-----
SAUR51_At1g75580 98 VVFRSLISMFR-----Y-----
SAUR54_At1g19830 102 VVFRSLISMFR-----Y-----
SAUR45_At2g36210 109 SVFQDVVNAVESCGNPFDF-----GEFVEEFL-----
SAUR34_At4g22620 136 SDFEYKTRIRASGSSSRVFP-----WGRHC--RN-----
SAUR35_At4g12410 133 SDFEYKTRIRASGSSSRVFP-----WGRHC--RN-----
SAUR39_At3g43120 133 EYFKYLLKCIENHPKDDTSA---EDPVETEE-----
SAUR70_At5g20810 133 EYFKYLLKCIENHPKDDTSA---EDPVETEE-----
SAUR73_At3g03847 125 DNFLTLL-----Y-----
SAUR2_At4g34780 86 DVFLDITSRRLKRNKFIETEI-----N-----
SAUR27_At3g03840 84 DTFITVTSRIQG-----Y-----
SAUR29_At3g03820 85 DTFITVTSRIQG-----Y-----
SAUR26_At3g03850 82 DTFISITSIQIG-----Y-----
SAUR28_At3g03830 82 YTFISITSIQIG-----Y-----
SAUR7_At2g21200 77 DTFVAAASQL-----Y-----
SAUR13_At4g38825 79 DTFITVTSRIQG-----Y-----
SAUR23_At5g18060 80 DTFINVTSLRH-----Y-----
SAUR22_At5g18050 80 DTFINVTSLRH-----Y-----
SAUR21_At5g18030 78 DTFINVTSLRH-----Y-----
SAUR20_At5g18020 80 DTFINVTSLRH-----Y-----
SAUR19_At5g18010 80 DTFINVTSLRH-----Y-----
SAUR24_At5g18080 80 DTFINVTSLRH-----Y-----
SAUR15_At4g38850 79 SLFFTVTSRIQ-----Y-----
SAUR25_At4g13790 82 AFFFTVTSRIQ-----Y-----
SAUR3_At4g34790 96 ESFLYLITSHOLH-----Y-----
SAUR5_At4g34810 94 EVFLDLIASRLQ-----Y-----
SAUR4_At4g34800 79 EYFKYLLKCIENHPKDDTSA---EDPVETEE-----
SAUR1_At4g34770 92 DYFTALASILSGS-----Y-----
SAUR6_At2g21210 85 QIFIDLASRLSTSS-----Y-----
SAUR14_At4g38840 89 EYFKYLLKCIENHPKDDTSA---EDPVETEE-----
SAUR79_At2g35290 89 ILFHEHLWMLLRNDASTFSD-----LDVL-EIIEFYAQD---C-----
SAUR74_At3g12955 108 VLFDEHLWMLRYGDEVHIL-----ESLD-DFAHLYLSP-----
SAUR76_At5g20820 96 VLFHEHLWMLLENADADE-----S--RPESVY-ELVEFYAC-----
SAUR77_At1g17345 95 VLFHEHLWMLKNSSDHGDEDDR--ERGSVE-ELAEFYTY-----
SAUR78_At1g72430 92 VLFHEHLWMLKNSSDHGDEDDR--ERGSVE-ELAEFYTY-----
consensus 181 dvfe lvslk

```

**Supplementary Figure 1.** Multiple protein sequence alignment of Arabidopsis SAUR family proteins. Protein sequence alignment was performed using Clustal Omega. The conserved SAUR domain sequence is underlined.

**Supplementary Figure 2.** Phylogenetic tree of Arabidopsis SAUR family proteins.

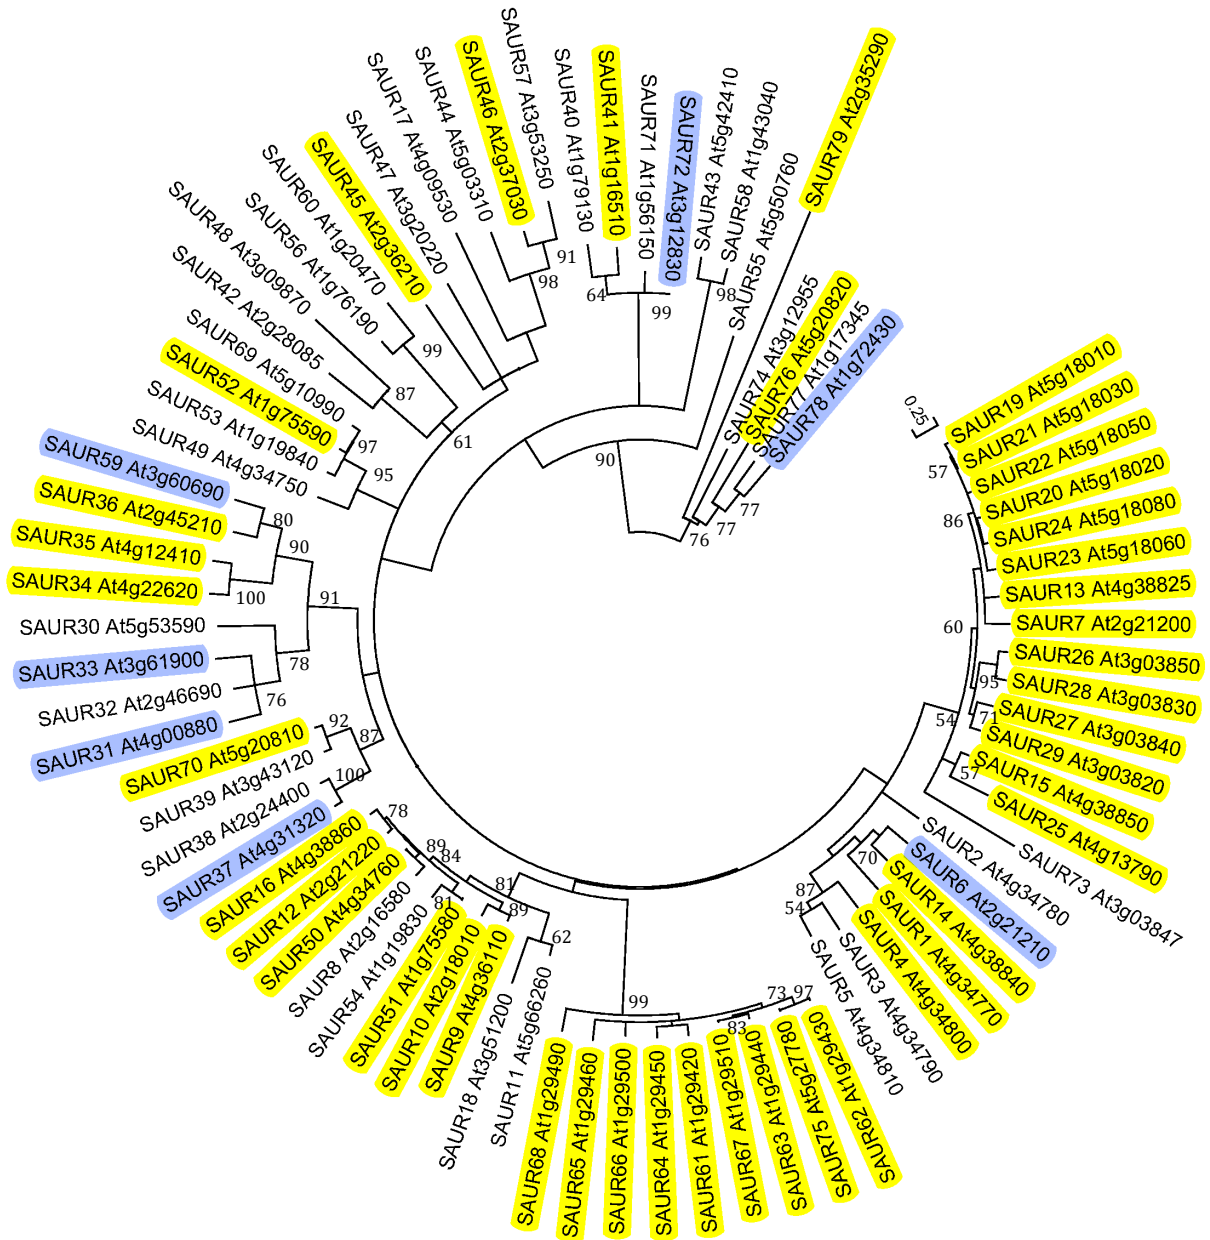

**Supplementary Figure 2.** Phylogenetic tree of Arabidopsis SAUR family proteins.

Neighbor-joining phylogenetic tree was constructed using Molecular Evolutionary Genetics Analysis (MEGA 6.06). Bootstrap values were obtained from 500 replicates and branches having values > 50 are shown. Scale bar indicates an evolutionary distance of 0.25 amino acid substitutions per position. Auxin induced SAURs are

highlighted in yellow, and auxin repressed *SAURs* are highlighted in blue. Data were obtained from Gil et al. (1994); Tian et al. (2002); Zhao et al. (2003); Goda et al. (2004); Nemhauser et al. (2004); Redman et al. (2004); Okushima et al. (2005); Paponov et al. (2008); Chapman et al. (2012); Spartz et al. (2012); Hou et al. (2013); Kong et al. (2013); Markakis et al. (2013); Stamm and Kumar (2013).

**Supplementary Table 1.** Putative DST elements within the 3'-UTR of Arabidopsis SAUR genes.

| Putative DST*              | Experimental support                  |
|----------------------------|---------------------------------------|
| <i>SAUR2</i> /At4g34780**  |                                       |
| <i>SAUR6</i> /At2g21210    |                                       |
| <i>SAUR8</i> /At2g16580    |                                       |
| <i>SAUR13</i> /At4g38825   |                                       |
| <i>SAUR15</i> /At4g38850   | Gil et al., 1994; Gil and Green, 1996 |
| <i>SAUR16</i> /At4g38860   |                                       |
| <i>SAUR22</i> /At5g18050   |                                       |
| <i>SAUR24</i> /At5g18080** |                                       |
| <i>SAUR26</i> /At3g03850   |                                       |
| <i>SAUR27</i> /At3g03840   |                                       |
| <i>SAUR28</i> /At3g03830   |                                       |
| <i>SAUR29</i> /At3g03820** |                                       |
| <i>SAUR31</i> /At4g00880   |                                       |
| <i>SAUR35</i> /At4g12410** |                                       |
| <i>SAUR36</i> /At2g45210   | Hou et al., 2013                      |
| <i>SAUR37</i> /At4g31320** |                                       |
| <i>SAUR49</i> /At4g34750   |                                       |
| <i>SAUR50</i> /At4g34760   |                                       |
| <i>SAUR51</i> /At1g75580   |                                       |
| <i>SAUR53</i> /At1g19840** |                                       |
| <i>SAUR54</i> /At1g19830   |                                       |
| <i>SAUR56</i> /At1g76190** |                                       |
| <i>SAUR57</i> /At3g53250** |                                       |
| <i>SAUR59</i> /At3g60690   |                                       |
| <i>SAUR61</i> /At1g29420   |                                       |
| <i>SAUR66</i> /At1g29500   |                                       |
| <i>SAUR68</i> /At1g29490   |                                       |
| <i>SAUR72</i> /At3g12830   |                                       |
| <i>SAUR75</i> /At5g27780** |                                       |
| <i>SAUR79</i> /At2g35290   |                                       |

\* Arabidopsis *SAUR* genes containing the DST consensus elements GGA(N)<sub>x</sub>ATAGAT(N)<sub>x</sub>GTA in their 3'-UTR sequence.

\*\* Arabidopsis *SAUR* genes lacking annotated 3'-UTR sequences in the TAIR database. For these genes, the 500 bp of genomic sequence downstream of the stop codon were searched for the DST consensus.

**Supplementary Table 2.** Brassinosteroid-regulated *SAUR* genes.

| <b>SAURs</b> | <b>AGI number</b> | <b>Regulation by brassinosteroids (BR)</b> | <b>BZR1 binding</b> | <b>BES1 binding</b> |
|--------------|-------------------|--------------------------------------------|---------------------|---------------------|
| SAUR1        | AT4G34770         | Induced                                    | Yes, HC             | No                  |
| SAUR7        | AT2G21200         | Induced                                    | Yes, HC             | No                  |
| SAUR9        | AT4G36110         | Induced                                    | Yes, LC             | No                  |
| SAUR10       | AT2G18010         | Induced                                    | Yes, LC             | No                  |
| SAUR12       | AT2G21220         | Induced                                    | Yes, HC             | No                  |
| SAUR14       | AT4G38840         | Induced                                    | Yes, LC             | No                  |
| SAUR15       | AT4G38850         | Induced                                    | Yes, HC             | No                  |
| SAUR16       | AT4G38860         | Induced                                    | Yes, HC             | Yes                 |
| SAUR23       | AT5G18060         | Induced                                    | No                  | No                  |
| SAUR25       | AT4G13790         | Induced                                    | Yes, HC             | No                  |
| SAUR27       | AT3G03840         | Induced                                    | No                  | Yes                 |
| SAUR28       | AT3G03830         | Induced                                    | No                  | Yes                 |
| SAUR30       | AT5G53590         | Induced                                    | Yes, LC             | No                  |
| SAUR32       | AT2G46690         | Induced                                    | No                  | No                  |
| SAUR50       | AT4G34760         | Induced                                    | Yes, HC             | No                  |
| SAUR62       | AT1G29430         | Induced                                    | Yes, HC             | No                  |
| SAUR63       | AT1G29440         | Induced                                    | Yes, HC             | No                  |
| SAUR64       | AT1G29450         | Induced                                    | Yes, HC             | No                  |
| SAUR65       | AT1G29460         | Induced                                    | No                  | NO                  |
| SAUR66       | AT1G29500         | Induced                                    | Yes, LC             | No                  |
| SAUR67       | AT1G29510         | Induced                                    | Yes, LC             | No                  |
| SAUR68       | AT1G29490         | Induced                                    | Yes, LC             | No                  |
| SAUR75       | AT5G27780         | Induced                                    | No                  | No                  |
| SAUR78       | AT1G72430         | Induced                                    | Yes, HC             | No                  |
| SAUR79       | AT2G35290         | Induced                                    | Yes, LC             | No                  |
| SAUR35       | AT4G12410         | Repressed                                  | No                  | No                  |
| SAUR36       | AT2G45210         | Repressed                                  | Yes, HC             | Yes                 |
| SAUR41       | AT1G16510         | Repressed                                  | Yes, HC             | No                  |
| SAUR44       | AT5G03310         | Repressed                                  | No                  | No                  |
| SAUR46       | AT2G37030         | Repressed                                  | No                  | No                  |
| SAUR51       | AT1G75580         | Repressed                                  | Yes, LC             | No                  |
| SAUR59       | AT3G60690         | Repressed                                  | Yes, HC             | Yes                 |
| SAUR71       | AT1G56150         | Repressed                                  | Yes, HC             | No                  |
| SAUR72       | AT3G12830         | Repressed                                  | No                  | No                  |

Data were obtained from Wang et al. (2012). HC, high confidence; LC, low confidence.

**Supplementary Table 3.** Gibberellin-regulated *SAUR* genes.

| <b>SAURs</b> | <b>AGI number</b> | <b>Regulation by gibberellins (GA)</b> |
|--------------|-------------------|----------------------------------------|
| SAUR3        | AT4G34790         | Induced                                |
| SAUR4        | AT4G34800         | Induced                                |
| SAUR5        | AT4G34810         | Induced                                |
| SAUR8        | AT2G16580         | Induced                                |
| SAUR11       | AT5G66260         | Induced                                |
| SAUR15       | AT4G38850         | Induced                                |
| SAUR16       | AT4G38860         | Induced                                |
| SAUR19       | AT5G18010         | Induced                                |
| SAUR20       | AT5G18020         | Induced                                |
| SAUR21       | AT5G18030         | Induced                                |
| SAUR23       | AT5G18060         | Induced                                |
| SAUR24       | AT5G18080         | Induced                                |
| SAUR26       | AT3G03850         | Induced                                |
| SAUR27       | AT3G03840         | Induced                                |
| SAUR28       | AT3G03830         | Induced                                |
| SAUR29       | AT3G03820         | Induced                                |
| SAUR46       | AT2G37030         | Induced                                |
| SAUR49       | AT4G34750         | Induced                                |
| SAUR50       | AT4G34760         | Induced                                |
| SAUR53       | AT1G19840         | Induced                                |
| SAUR55       | AT5G50760         | Induced                                |
| SAUR57       | AT3G53250         | Induced                                |
| SAUR64       | AT1G29450         | Induced                                |
| SAUR65       | AT1G29460         | Induced                                |
| SAUR66       | AT1G29500         | Induced                                |
| SAUR67       | AT1G29510         | Induced                                |
| SAUR68       | AT1G29490         | Induced                                |
| SAUR31       | AT4G00880         | Repressed                              |
| SAUR71       | AT1G56150         | Repressed                              |

Data were obtained from Bai et al. (2012).



**Supplementary Table 4.** Abscisic acid- and jasmonate-regulated *SAUR* genes.

| <b>SAURs</b>  | <b>AGI number</b> | <b>Regulation by abscisic acid (ABA)</b>   |
|---------------|-------------------|--------------------------------------------|
| <i>SAUR30</i> | AT5G53590         | Induced                                    |
| <i>SAUR36</i> | AT2G45210         | Induced                                    |
| <i>SAUR41</i> | AT1G16510         | Induced                                    |
| <i>SAUR59</i> | AT3G60690         | Induced                                    |
| <i>SAUR72</i> | AT3G12830         | Induced                                    |
| <i>SAUR1</i>  | AT4G34770         | Repressed                                  |
| <i>SAUR6</i>  | AT2G21210         | Repressed                                  |
| <i>SAUR12</i> | AT2G21220         | Repressed                                  |
| <i>SAUR14</i> | AT4G38840         | Repressed                                  |
| <i>SAUR16</i> | AT4G38860         | Repressed                                  |
| <i>SAUR31</i> | AT4G00880         | Repressed                                  |
| <i>SAUR50</i> | AT4G34760         | Repressed                                  |
| <i>SAUR55</i> | AT5G50760         | Repressed                                  |
| <i>SAUR62</i> | AT1G29430         | Repressed                                  |
| <i>SAUR78</i> | AT1G72430         | Repressed                                  |
| <b>SAURs</b>  |                   |                                            |
| <b>SAURs</b>  | <b>AGI number</b> | <b>Regulation by methyl jasmonate (MJ)</b> |
| <i>SAUR9</i>  | AT4G36110         | Induced                                    |
| <i>SAUR1</i>  | AT4G34770         | Repressed                                  |
| <i>SAUR14</i> | AT4G38840         | Repressed                                  |
| <i>SAUR16</i> | AT4G38860         | Repressed                                  |
| <i>SAUR23</i> | AT5G18060         | Repressed                                  |
| <i>SAUR31</i> | AT4G00880         | Repressed                                  |
| <i>SAUR36</i> | AT2G45210         | Repressed                                  |
| <i>SAUR49</i> | AT4G34750         | Repressed                                  |
| <i>SAUR50</i> | AT4G34760         | Repressed                                  |
| <i>SAUR59</i> | AT3G60690         | Repressed                                  |
| <i>SAUR62</i> | AT1G29430         | Repressed                                  |
| <i>SAUR63</i> | AT1G29440         | Repressed                                  |

Data were obtained from Nemhauser et al. (2006).
